# Supplementary material
Source: HighWire-hosted journal article supplement (https://svn.bmj.com/content/8/5/379)
Supplement: inline-supplementary-material-1 [file inline-supplementary-material-1.pdf]

## **SUPPLEMENTAL MATERIAL**

### **Stroke and Vascular Neurology**

#### **Retinal microvascular signs and recurrent vascular events in patients with TIA or minor stroke**

Supplemental table 1. Baseline characteristics by fundus groups

|                                      | No or mild vascular retinopathy |            | Moderate vascular retinopathy |            | Vascular retinopathy with vessel rarefaction |            |
|--------------------------------------|---------------------------------|------------|-------------------------------|------------|----------------------------------------------|------------|
|                                      | Yes (n=155)                     | No (n=567) | Yes (n=473)                   | No (n=249) | Yes (n=94)                                   | No (n=628) |
| Age (years), mean (±SD)              | 64 (±11)                        | 70 (±9)    | 70 (±10)                      | 67 (±11)   | 72 (±7)                                      | 68 (±10)   |
| Sex, n (%)                           |                                 |            |                               |            |                                              |            |
| Female                               | 59 (38.1)                       | 192 (33.9) | 160 (33.8)                    | 91 (36.5)  | 32 (34.0)                                    | 219 (34.9) |
| Male                                 | 96 (61.9)                       | 375 (66.1) | 313 (66.2)                    | 158 (63.5) | 62 (66.0)                                    | 409 (65.1) |
| Study arm, n (%)                     |                                 |            |                               |            |                                              |            |
| Conventional care                    | 67 (56.8)                       | 285 (50.3) | 235 (49.7)                    | 114 (45.8) | 47 (50.0)                                    | 305 (51.4) |
| Intensified care                     | 88 (43.2)                       | 282 (49.7) | 238 (50.3)                    | 135 (54.2) | 47 (50.0)                                    | 323 (48.6) |
| BMI (kg/m <sup>2</sup> ), mean (±SD) | 29 (±5)                         | 28 (±4)    | 28 (±4)                       | 28 (±5)    | 27 (±4)                                      | 28 (±4)    |
| ABCD2, median (IQR)                  | 4 (3-5)                         | 4 (4-5)    | 4 (4-5)                       | 4 (4-5)    | 5 (4-6)                                      | 4 (4-5)    |
| NIHSS, median (IQR)†                 | 1 (0-2)                         | 1 (0-2)    | 1 (0-2)                       | 1 (0-2)    | 1 (0-2)                                      | 1 (0-2)    |
| Carotid surgery, n (%)               | 5 (3.2)                         | 17 (3.0)   | 13 (2.7)                      | 9 (3.6)    | 4 (4.3)                                      | 18 (2.9)   |
| Vascular risk factors, n (%)         |                                 |            |                               |            |                                              |            |
| Hypertension                         | 127 (81.9)                      | 513 (90.5) | 423 (89.4)                    | 217 (87.1) | 90 (95.7)                                    | 550 (87.6) |
| Diabetes mellitus                    | 41 (26.5)                       | 133 (23.5) | 116 (24.5)                    | 58 (23.3)  | 17 (18.1)                                    | 157 (25.0) |
| Atrial fibrillation                  | 27 (17.4)                       | 100 (17.6) | 88 (18.6)                     | 39 (15.7)  | 12 (12.8)                                    | 115 (18.3) |
| Smoking                              | 43 (27.7)                       | 84 (14.8)  | 72 (15.2)                     | 55 (22.1)  | 12 (12.8)                                    | 115 (18.3) |
| Index event, n (%)                   |                                 |            |                               |            |                                              |            |
| TIA                                  | 71 (45.8)                       | 255 (45.0) | 223 (47.1)                    | 103 (41.4) | 32 (34.0)                                    | 294 (46.8) |
| Minor stroke                         | 84 (54.2)                       | 312 (55.0) | 250 (52.9)                    | 146 (58.6) | 62 (66.0)                                    | 334 (53.2) |
| Stroke etiology, n (%)               |                                 |            |                               |            |                                              |            |
| Large vessel atherosclerosis         | 16 (10.3)                       | 51 (9.0)   | 40 (8.5)                      | 27 (10.8)  | 11 (11.7)                                    | 56 (8.9)   |
| Cardioembolism                       | 30 (19.4)                       | 103 (18.2) | 88 (18.6)                     | 45 (18.1)  | 15 (16.0)                                    | 118 (18.8) |
| Small vessel disease                 | 8 (5.2)                         | 51 (9.0)   | 39 (8.2)                      | 20 (8.0)   | 12 (12.8)                                    | 47 (7.5)   |
| Other etiology                       | 0 (0)                           | 11 (1.9)   | 11 (2.3)                      | 0 (0)      | 0 (0)                                        | 11 (1.8)   |
| Undetermined cause                   | 101 (65.2)                      | 351 (61.9) | 295 (62.4)                    | 157 (63.1) | 56 (59.6)                                    | 396 (63.1) |
| Previous vascular event, n (%)       |                                 |            |                               |            |                                              |            |
| TIA‡                                 | 9 (5.8)                         | 31 (5.7)   | 24 (5.3)                      | 16 (6.6)   | 7 (7.6)                                      | 33 (5.5)   |
| Stroke§                              | 25 (16.2)                       | 92 (16.5)  | 70 (15.1)                     | 47 (19.0)  | 22 (23.7)                                    | 95 (15.4)  |
| Myocardial infarction                | 12 (7.7)                        | 45 (8.1)   | 37 (7.9)                      | 20 (8.1)   | 8 (8.6)                                      | 49 (7.9)   |

†Data available for 720 patients

‡Data available for 696 patients

§Data available for 710 patients

||Data available for 714 patients

SD, standard deviation; BMI, body mass index; IQR, interquartile range; NIHSS, National Institute of Health stroke scale; TIA, transient ischemic attack.

Supplemental table 2. Cox proportional hazards for bivariate hazard ratios

|                                                     | Composite events (N=109) |              | Recurrent stroke (N=74) |              | Acute coronary syndrome (N=20) |              | Vascular death (N=15)   |              |
|-----------------------------------------------------|--------------------------|--------------|-------------------------|--------------|--------------------------------|--------------|-------------------------|--------------|
|                                                     | HR (95% CI)              | p value      | HR (95% CI)             | p value      | HR (95% CI)                    | p value      | HR (95% CI)             | p value      |
| Age                                                 | 1.04 (1.01-1.06)         | 0.001        | 1.04 (1.01-1.07)        | 0.004        | 1.03 (0.98-1.09)               | 0.230        | 1.03 (0.97-1.09)        | 0.398        |
| Sex                                                 | 0.93 (0.62-1.38)         | 0.703        | 0.95 (0.58-1.53)        | 0.819        | 0.65 (0.23-1.78)               | 0.396        | 1.28 (0.46-3.59)        | 0.640        |
| Study arm (conventional care)                       | 1.08 (0.74-1.57)         | 0.699        | 1.02 (0.64-1.61)        | 0.941        | 1.53 (0.63-3.75)               | 0.351        | 0.90 (0.33-2.48)        | 0.835        |
| BMI (kg/m <sup>2</sup> )                            | 1.00 (0.96-1.04)         | 0.988        | 0.99 (0.94-1.04)        | 0.747        | 1.00 (0.90-1.10)               | 0.930        | 1.05 (0.94-1.16)        | 0.417        |
| ABCD2                                               | 1.16 (0.99-1.36)         | 0.062        | 1.27 (1.05-1.54)        | 0.014        | 1.04 (0.72-1.52)               | 0.821        | 0.86 (0.55-1.33)        | 0.484        |
| NIHSS†                                              | 1.04 (0.97-1.12)         | 0.284        | 1.06 (0.97-1.15)        | 0.202        | 1.01 (0.84-1.21)               | 0.928        | 1.00 (0.81-1.23)        | 1.000        |
| Carotid surgery                                     | 2.06 (0.95-4.48)         | 0.068        | 1.18 (0.37-3.82)        | 0.780        | 6.06 (1.77-20.74)              | 0.004        | 2.36 (0.31-17.98)       | 0.406        |
| Vascular risk factors                               |                          |              |                         |              |                                |              |                         |              |
| Hypertension                                        | 1.04 (0.54-1.99)         | 0.914        | 0.96 (0.44-2.10)        | 0.920        | 2.06 (0.28-15.37)              | 0.483        | 0.79 (0.18-3.50)        | 0.757        |
| Diabetes mellitus                                   | 1.58 (1.06-2.35)         | 0.024        | 1.47 (0.90-2.40)        | 0.121        | 1.65 (0.66-4.13)               | 0.287        | 2.09 (0.74-5.86)        | 0.163        |
| Atrial fibrillation                                 | 1.07 (0.63-1.83)         | 0.793        | 1.41 (0.77-2.59)        | 0.263        | 0.67 (0.16-2.90)               | 0.594        | 0.36 (0.05-2.76)        | 0.327        |
| Smoking                                             | 1.15 (0.73-1.83)         | 0.548        | 0.81 (0.44-1.51)        | 0.510        | 1.87 (0.71-4.89)               | 0.204        | 2.41 (0.82-7.04)        | 0.109        |
| Index event (minor stroke)                          | 1.53 (1.04-2.27)         | 0.033        | 1.28 (0.80-2.04)        | 0.298        | 2.44 (0.89-6.71)               | 0.084        | 2.23 (0.71-7.00)        | 0.170        |
| Stroke etiology                                     |                          |              |                         |              |                                |              |                         |              |
| Large vessel atherosclerosis                        | 1.45 (0.80-2.63)         | 0.225        | 1.21 (0.57-2.57)        | 0.615        | 4.71 (1.33-16.68)              | 0.016        | 0.66 (0.09-5.10)        | 0.689        |
| Cardioembolism                                      | 1.14 (0.67-1.95)         | 0.634        | 1.05 (0.54-2.03)        | 0.888        | 2.77 (0.78-9.85)               | 0.114        | 0.66 (0.15-2.99)        | 0.592        |
| Small vessel disease                                | 1.05 (0.55-2.00)         | 0.880        | 0.52 (0.19-1.45)        | 0.210        | 5.59 (1.80-17.37)              | 0.003        | 0.63 (0.08-4.88)        | 0.658        |
| Other etiology                                      | 3.73 (1.16-11.95)        | 0.027        | 5.69 (1.74-18.57)       | 0.004        | 0                              | 0            | 0                       | 0            |
| Undetermined cause                                  | Reference                |              | Reference               |              | Reference                      |              | Reference               |              |
| Previous vascular event                             |                          |              |                         |              |                                |              |                         |              |
| TIA‡                                                | 1.90 (1.01-3.55)         | 0.046        | 2.39 (1.18-4.83)        | 0.015        | 0                              | 0            | 2.54 (0.57-11.34)       | 0.223        |
| Stroke§                                             | 1.61 (1.03-2.51)         | 0.037        | 1.38 (0.79-2.41)        | 0.259        | 4.37 (1.77-10.75)              | 0.001        | 0.40 (0.05-3.04)        | 0.374        |
| Myocardial infarction                               | 1.98 (1.14-3.42)         | 0.015        | 1.31 (0.60-2.86)        | 0.498        | 4.12 (1.48-11.45)              | 0.007        | 2.89 (0.82-10.25)       | 0.100        |
| <b>Fundus group</b>                                 |                          |              |                         |              |                                |              |                         |              |
| <b>No or mild vascular retinopathy</b>              | <b>Reference</b>         |              | <b>Reference</b>        |              | <b>Reference</b>               |              | <b>Reference</b>        |              |
| <b>Moderate vascular retinopathy</b>                | <b>1.19 (0.75-1.88)</b>  | <b>0.469</b> | <b>1.55 (0.86-2.78)</b> | <b>0.143</b> | <b>0.51 (0.18-1.47)</b>        | <b>0.214</b> | <b>1.00 (0.31-3.21)</b> | <b>0.998</b> |
| <b>Vascular retinopathy with vessel rarefaction</b> | <b>1.40 (0.79-2.47)</b>  | <b>0.248</b> | <b>1.54 (0.76-3.15)</b> | <b>0.234</b> | <b>1.64 (0.55-4.89)</b>        | <b>0.374</b> | <b>0.45 (0.05-4.02)</b> | <b>0.474</b> |

†Data available for 720 patients

‡Data available for 696 patients

§Data available for 710 patients

||Data available for 714 patients

HR, hazard ratio; CI, confidence intervals; BMI, body mass index; NIHSS, National Institute of Health stroke scale; TIA, transient ischemic attack.

Supplemental table 3. Post-hoc analysis: Baseline characteristics of patients with diabetes mellitus and hypertension

|                                              | Total (n=154)  | Composite events |               | Recurrent stroke | Acute coronary syndrome | Vascular death |
|----------------------------------------------|----------------|------------------|---------------|------------------|-------------------------|----------------|
|                                              |                | Yes (n=32)       | No (n=122)    | Yes (n=20)       | Yes (n=7)               | Yes (n=5)      |
| Age (years), mean ( $\pm$ SD)                | 69 ( $\pm$ 10) | 70 ( $\pm$ 11)   | 69 ( $\pm$ 9) | 71 ( $\pm$ 12)   | 68 ( $\pm$ 10)          | 70 ( $\pm$ 9)  |
| Sex, n (%)                                   |                |                  |               |                  |                         |                |
| Female                                       | 47 (30.5)      | 10 (31.3)        | 37 (30.3)     | 5 (25.0)         | 2 (28.6)                | 3 (60.0)       |
| Male                                         | 107 (69.5)     | 22 (68.8)        | 85 (69.7)     | 15 (75.0)        | 5 (71.4)                | 2 (40.0)       |
| Study arm, n (%)                             |                |                  |               |                  |                         |                |
| Conventional care                            | 77 (50.0)      | 20 (37.5)        | 57 (46.7)     | 13 (65.0)        | 4 (57.1)                | 3 (60.0)       |
| Intensified care                             | 77 (50.0)      | 12 (62.5)        | 65 (53.3)     | 7 (35.0)         | 3 (42.9)                | 2 (40.0)       |
| BMI (kg/m <sup>2</sup> ), mean (SD)          | 30 ( $\pm$ 5)  | 30 ( $\pm$ 4)    | 30 ( $\pm$ 5) | 29 ( $\pm$ 4)    | 33 ( $\pm$ 4)           | 30 ( $\pm$ 5)  |
| ABCD2, median (IQR)                          | 5 (4-6)        | 5 (4-6)          | 5 (4-6)       | 5 (4-6)          | 5 (4-6)                 | 4 (3.5-6)      |
| NIHSS, median (IQR)                          | 1 (0-2)        | 1 (0-2)          | 1 (0-2)       | 1 (0-1)          | 1 (1-3)                 | 2 (0-2.5)      |
| Carotid surgery, n (%)                       | 7 (4.5)        | 1 (3.1)          | 6 (4.9)       | 0 (0)            | 1 (14.3)                | 0 (0)          |
| Vascular risk factors, n (%)                 |                |                  |               |                  |                         |                |
| Atrial fibrillation                          | 21 (12.6)      | 1 (3.1)          | 20 (16.4)     | 1 (5.0)          | 0 (0)                   | 0 (0)          |
| Smoking                                      | 25 (16.2)      | 11 (34.4)        | 14 (11.5)     | 5 (25.0)         | 4 (57.1)                | 2 (40.0)       |
| Index event, n (%)                           |                |                  |               |                  |                         |                |
| TIA                                          | 71 (46.1)      | 15 (46.9)        | 56 (45.9)     | 13 (65.0)        | 1 (14.3)                | 1 (20.0)       |
| Minor stroke                                 | 83 (54.9)      | 17 (53.1)        | 66 (54.1)     | 7 (35.0)         | 6 (85.7)                | 4 (80.0)       |
| Stroke etiology, n (%)                       |                |                  |               |                  |                         |                |
| Large vessel atherosclerosis                 | 25 (16.2)      | 5 (15.6)         | 20 (16.4)     | 3 (15.0)         | 1 (14.3)                | 1 (20.0)       |
| Cardioembolism                               | 25 (16.2)      | 4 (12.5)         | 21 (17.2)     | 3 (15.0)         | 1 (14.3)                | 0 (0)          |
| Small vessel disease                         | 15 (9.7)       | 5 (15.6)         | 10 (8.2)      | 1 (5.0)          | 3 (42.9)                | 1 (20.0)       |
| Other etiology                               | 1 (0.6)        | 0 (0)            | 1 (0.8)       | 0 (0)            | 0                       | 0 (0)          |
| Undetermined cause                           | 88 (57.1)      | 18 (56.3)        | 70 (57.4)     | 13 (65.0)        | 2 (28.6)                | 3 (60.0)       |
| Previous vascular event, n (%)               |                |                  |               |                  |                         |                |
| TIA <sup>†</sup>                             | 6 (4.0)        | 1 (3.3)          | 5 (4.1)       | 1 (5.6)          | 0 (0)                   | 0 (0)          |
| Stroke <sup>‡</sup>                          | 26 (17.1)      | 7 (22.6)         | 19 (15.7)     | 3 (15.8)         | 4 (57.1)                | 0 (0)          |
| Myocardial infarction <sup>  </sup>          | 19 (12.6)      | 6 (18.8)         | 13 (10.7)     | 2 (10.0)         | 2 (28.6)                | 2 (40.0)       |
| Fundus groups, n (%)                         |                |                  |               |                  |                         |                |
| No or mild vascular retinopathy              | 34 (22.1)      | 8 (25.0)         | 26 (21.3)     | 2 (10.0)         | 5 (71.4)                | 1 (20.0)       |
| Moderate vascular retinopathy                | 103 (66.9)     | 18 (56.3)        | 85 (69.7)     | 13 (65.0)        | 2 (28.6)                | 3 (60.0)       |
| Vascular retinopathy with vessel rarefaction | 17 (11.0)      | 6 (18.8)         | 11 (9.0)      | 5 (25.0)         | 0 (0)                   | 1 (20.0)       |

<sup>†</sup>Data available for 151 patients

<sup>‡</sup>Data available for 152 patients

<sup>||</sup>Data available for 151 patients

SD, standard deviation; BMI, body mass index; IQR, interquartile range; NIHSS, National Institute of Health stroke scale; TIA, transient ischemic attack.

Supplemental table 4. Secondary prevention targets at 1 year follow-up by fundus category

|                                                                                     | Total<br>(n=722)   | No or mild vascular retinopathy |                    |         | Moderate vascular retinopathy |                    |         | Vascular retinopathy with vessel rarefaction |                    |         |
|-------------------------------------------------------------------------------------|--------------------|---------------------------------|--------------------|---------|-------------------------------|--------------------|---------|----------------------------------------------|--------------------|---------|
|                                                                                     |                    | Yes<br>(n=155)                  | No<br>(n=567)      | p-value | Yes<br>(n=473)                | No<br>(n=249)      | p-value | Yes<br>(n=94)                                | No<br>(n=628)      | p-value |
| Systolic blood pressure (mmHg), mean (SD)                                           | 130.4<br>(±14.9)   | 126.8<br>(±15.5)                | 131.4<br>(±14.6)   | 0.002   | 131.1<br>(±14.5)              | 129.0<br>(±15.5)   | 0.088   | 132.5<br>(±15.0)                             | 130.1<br>(±14.9)   | 0.158   |
| Diastolic blood pressure (mmHg), mean (SD)                                          | 78.7<br>(±9.6)     | 77.7<br>(±10.0)                 | 78.9<br>(±9.4)     | 0.197   | 78.7<br>(±9.5)                | 78.5<br>(±9.8)     | 0.737   | 79.7<br>(±9.4)                               | 78.5<br>(±9.6)     | 0.276   |
| Blood pressure target achieved†                                                     | 59.7%<br>(368/616) | 67.7%<br>(90/133)               | 57.6%<br>(278/483) | 0.035   | 59.1%<br>(237/401)            | 60.9%<br>(131/215) | 0.659   | 50.0%<br>(41/82)                             | 61.2%<br>(327/534) | 0.053   |
| LDL (mg/dl), mean (SD)                                                              | 93.7<br>(±34.0)    | 91.5<br>(±33.2)                 | 94.3<br>(±34.3)    | 0.401   | 94.1<br>(±33.6)               | 93.1<br>(±35.0)    | 0.752   | 95.7<br>(±37.6)                              | 93.4<br>(±33.5)    | 0.570   |
| LDL target achieved‡                                                                | 54.5%<br>(324/594) | 58.9%<br>(76/129)               | 53.3%<br>(248/465) | 0.260   | 53.4%<br>(206/384)            | 56.2%<br>(118/210) | 0.552   | 51.9%<br>(42/81)                             | 55.0%<br>(282/513) | 0.621   |
| Smoking abstinence                                                                  | 88.3%<br>(564/639) | 79.4%<br>(108/136)              | 90.7%<br>(456/503) | 0.001   | 90.6%<br>(378/417)            | 83.8%<br>(186/222) | 0.010   | 90.7%<br>(78/86)                             | 87.9%<br>(486/553) | 0.451   |
| HbA1c (%), mean (SD)                                                                | 5.9<br>(±0.8)      | 6.0<br>(±0.9)                   | 5.9<br>(±0.8)      | 0.418   | 5.9<br>(±0.8)                 | 6.0<br>(±0.8)      | 0.810   | 5.9<br>(±0.7)                                | 6.0<br>(±0.8)      | 0.520   |
| HbA1c target achieved§                                                              | 95.7%<br>(553/578) | 92.7%<br>(115/124)              | 96.5%<br>(438/454) | 0.070   | 96.3%<br>(364/378)            | 94.5%<br>(189/200) | 0.313   | 97.4%<br>(74/76)                             | 95.4%<br>(479/502) | 0.436   |
| Patients taking platelet inhibitors of all patients not taking oral anticoagulation | 93.9%<br>(460/490) | 95.2%<br>(99/104)               | 93.5%<br>(361/386) | 0.529   | 92.8%<br>(297/320)            | 95.9%<br>(163/170) | 0.177   | 97.0%<br>(64/66)                             | 93.4%<br>(396/424) | 0.260   |
| Patients with atrial fibrillation taking oral anticoagulation                       | 91.2%<br>(135/148) | 93.8<br>(30/32)                 | 90.5%<br>(105/116) | 0.567   | 89.7%<br>(87/97)              | 94.1%<br>(48/51)   | 0.366   | 94.7%<br>(18/19)                             | 90.7%<br>(117/129) | 0.561   |
| Physical activity target achieved                                                   | 21.3%<br>(136/639) | 27.5%<br>(38/138)               | 19.6%<br>(98/501)  | 0.043   | 20.0%<br>(83/415)             | 23.7%<br>(53/224)  | 0.281   | 17.4%<br>(15/86)                             | 21.9%<br>(121/553) | 0.349   |

†<140/85 mmHg in patients who are not diabetic and <130/80 mmHg in patients who are diabetic.

‡Target for LDL was <100 mg/dl and <70 mg/dl in patients with coronary artery disease or symptomatic intracranial or extracranial artery stenosis.

§Target in patients with diabetes was less than 58.5 mmol/mol.

||Target for physical activities (self-reported) was ≥30 min per day at least three times per week

Statistical tests used: independent t test for continuous variables and Pearson Chi square test for categorical variables.

SD, standard deviation; LDL, low density lipoprotein.

Supplemental table 5. Secondary prevention targets at 2 year follow-up by fundus category

|                                                                                     | Total<br>(N=722)   | No or mild vascular retinopathy |                    |         | Moderate vascular retinopathy |                    |         | Vascular retinopathy with vessel rarefaction |                    |         |
|-------------------------------------------------------------------------------------|--------------------|---------------------------------|--------------------|---------|-------------------------------|--------------------|---------|----------------------------------------------|--------------------|---------|
|                                                                                     |                    | Yes<br>(N=155)                  | No<br>(N=567)      | p-value | Yes<br>(N=473)                | No<br>(N=249)      | p-value | Yes<br>(N=94)                                | No<br>(N=628)      | p-value |
| Systolic blood pressure (mmHg), mean (SD)                                           | 130.0<br>(±16.0)   | 126.8<br>(±15.8)                | 131.1<br>(±15.9)   | 0.015   | 130.1<br>(±15.8)              | 130.0<br>(±16.3)   | 0.937   | 135.1<br>(±15.7)                             | 129.2<br>(±15.9)   | 0.005   |
| Diastolic blood pressure (mmHg), mean (SD)                                          | 78.4<br>(±8.4)     | 77.3<br>(±8.3)                  | 78.7<br>(±8.4)     | 0.115   | 78.4<br>(±8.3)                | 78.4<br>(±8.3)     | 0.947   | 80.2<br>(±8.4)                               | 78.1<br>(±8.3)     | 0.046   |
| Blood pressure target achieved†                                                     | 59.4%<br>(277/466) | 65.2%<br>(73/112)               | 57.6%<br>(204/354) | 0.156   | 60.4%<br>(172/285)            | 58.0%<br>(105/181) | 0.616   | 46.4%<br>(32/69)                             | 61.7%<br>(245/397) | 0.017   |
| LDL (md/dl), mean (SD)                                                              | 94.6<br>(±34.7)    | 90.4<br>(±32.0)                 | 96.0<br>(±35.5)    | 0.140   | 95.6<br>(±34.9)               | 93.2<br>(±34.5)    | 0.475   | 97.9<br>(±38.2)                              | 94.1<br>(±34.1)    | 0.412   |
| LDL target achieved‡                                                                | 54.1%<br>(242/447) | 56.8%<br>(63/111)               | 53.3%<br>(179/336) | 0.523   | 53.7%<br>(146/272)            | 54.9%<br>(96/175)  | 0.807   | 51.6%<br>(33/64)                             | 54.6%<br>(209/383) | 0.655   |
| Smoking abstinence                                                                  | 87.5%<br>(443/506) | 81.8%<br>(99/121)               | 89.4%<br>(344/385) | 0.029   | 89.6%<br>(284/317)            | 84.1%<br>(159/189) | 0.072   | 88.2%<br>(60/68)                             | 87.4%<br>(383/438) | 0.854   |
| HbA1c (%), mean (SD)                                                                | 5.9<br>(±0.8)      | 6.0<br>(±0.8)                   | 5.9<br>(±0.8)      | 0.245   | 5.9 (±0.8)                    | 5.9<br>(±0.8)      | 0.891   | 5.8<br>(±0.7)                                | 5.9<br>(±0.8)      | 0.109   |
| HbA1c target achieved§                                                              | 96.3%<br>(418/434) | 97.1%<br>(102/105)              | 96.1%<br>(317/330) | 0.608   | 96.3%<br>(257/267)            | 96.4%<br>(162/168) | 0.925   | 95.2%<br>(60/63)                             | 96.5%<br>(359/372) | 0.621   |
| Patients taking platelet inhibitors of all patients not taking oral anticoagulation | 95.5%<br>(359/376) | 95.5%<br>(84/88)                | 95.5%<br>(275/288) | 0.990   | 94.5%<br>(222/235)            | 97.2%<br>(137/141) | 0.223   | 100%<br>(53/53)                              | 94.7%<br>(306/323) | 0.087   |
| Patients with atrial fibrillation taking oral anticoagulation                       | 96.6%<br>(113/117) | 96.8%<br>(30/31)                | 96.5%<br>(83/86)   | 0.945   | 95.8%<br>(68/71)              | 97.8%<br>(45/46)   | 0.551   | 100%<br>(15/15)                              | 96.1%<br>(98/102)  | 0.435   |
| Physical activity target achieved                                                   | 21.1%<br>(108/511) | 22.1%<br>(27/122)               | 20.8%<br>(81/389)  | 0.757   | 21.7%<br>(69/318)             | 20.2%<br>(39/193)  | 0.689   | 16.9%<br>(12/71)                             | 21.8%<br>(96/440)  | 0.346   |

†<140/85 mmHg in patients who are not diabetic and <130/80 mmHg in patients who are diabetic.

‡Target for LDL was <100 mg/dl and <70 mg/dl in patients with coronary artery disease or symptomatic intracranial or extracranial artery stenosis.

§Target in patients with diabetes was less than 58.5 mmol/mol.

||Target for physical activities (self-reported) was ≥30 min per day at least three times per week

Statistical tests used: independent t test for continuous variables and Pearson Chi square test for categorical variables.

SD, standard deviation; LDL, low density lipoprotein.

Supplemental table 6. Secondary prevention targets at 3 year follow-up by fundus category

|                                                                                     | Total<br>(N=722)   | No or mild vascular retinopathy |                    |         | Moderate vascular retinopathy |                    |         | Vascular retinopathy with vessel rarefaction |                    |         |
|-------------------------------------------------------------------------------------|--------------------|---------------------------------|--------------------|---------|-------------------------------|--------------------|---------|----------------------------------------------|--------------------|---------|
|                                                                                     |                    | Yes<br>(N=155)                  | No<br>(N=567)      | p-value | Yes<br>(N=473)                | No<br>(N=249)      | p-value | Yes<br>(N=94)                                | No<br>(N=628)      | p-value |
| Systolic blood pressure (mmHg), mean (SD)                                           | 131.0<br>(±16.0)   | 129.1<br>(±13.8)                | 131.6<br>(±16.6)   | 0.196   | 131.0<br>(±16.4)              | 131.1<br>(±15.3)   | 0.894   | 134.5<br>(±17.3)                             | 130.4<br>(±15.7)   | 0.077   |
| Diastolic blood pressure (mmHg), mean (SD)                                          | 78.7<br>(±9.6)     | 79.2<br>(±8.6)                  | 78.6<br>(±9.8)     | 0.599   | 78.4<br>(±10.1)               | 79.3<br>(±8.7)     | 0.342   | 79.5<br>(±8.9)                               | 78.6<br>(±9.7)     | 0.500   |
| Blood pressure target achieved†                                                     | 59.6%<br>(227/381) | 64.5%<br>(60/93)                | 58.0%<br>(167/288) | 0.265   | 59.2%<br>(138/233)            | 60.1%<br>(89/148)  | 0.860   | 52.7%<br>(29/55)                             | 60.7%<br>(198/326) | 0.263   |
| LDL (mg/dl), mean (SD)                                                              | 97.0<br>(±34.4)    | 95.5<br>(±33.7)                 | 97.4<br>(±34.6)    | 0.651   | 97.6<br>(±34.0)               | 96.1<br>(±35.2)    | 0.684   | 96.9<br>(±37.8)                              | 97.0<br>(±33.9)    | 0.986   |
| LDL target achieved‡                                                                | 50.0%<br>(185/370) | 52.9%<br>(45/85)                | 49.1%<br>(140/285) | 0.537   | 49.1%<br>(114/232)            | 51.4%<br>(71/138)  | 0.667   | 49.1%<br>(26/53)                             | 50.2%<br>(159/317) | 0.882   |
| Smoking abstinence                                                                  | 89.4%<br>(380/425) | 82.0%<br>(82/100)               | 91.7%<br>(298/325) | 0.006   | 91.7%<br>(242/264)            | 85.7%<br>(138/161) | 0.053   | 91.8%<br>(56/61)                             | 89.0%<br>(324/364) | 0.512   |
| HbA1c (%), mean (SD)                                                                | 6.0<br>(±0.8)      | 6.0<br>(±0.8)                   | 5.9<br>(±0.8)      | 0.732   | 6.0 (±0.8)                    | 5.9<br>(±0.7)      | 0.798   | 5.9<br>(±0.6)                                | 6.0<br>(±0.8)      | 0.440   |
| HbA1c target achieved§                                                              | 95.5%<br>(341/357) | 93.8%<br>(75/80)                | 96.0%<br>(266/277) | 0.386   | 95.2%<br>(217/228)            | 96.1%<br>(124/129) | 0.677   | 100%<br>(49/49)                              | 94.8%<br>(292/308) | 0.103   |
| Patients taking platelet inhibitors of all patients not taking oral anticoagulation | 94.7%<br>(302/319) | 94.4%<br>(68/72)                | 94.7%<br>(234/247) | 0.923   | 94.0%<br>(188/200)            | 95.8%<br>(114/119) | 0.489   | 97.9%<br>(46/47)                             | 94.1%<br>(256/272) | 0.290   |
| Patients with atrial fibrillation taking oral anticoagulation                       | 94.2%<br>(98/104)  | 96.0<br>(24/25)                 | 93.7%<br>(74/79)   | 0.663   | 95.4%<br>(62/65)              | 92.3%<br>(36/39)   | 0.515   | 85.7%<br>(12/14)                             | 95.6%<br>(86/90)   | 0.142   |
| Physical activity target achieved                                                   | 19.1%<br>(82/429)  | 23.2%<br>(23/99)                | 17.9%<br>(59/330)  | 0.235   | 18.3%<br>(49/268)             | 20.5%<br>(33/161)  | 0.572   | 16.1%<br>(10/62)                             | 19.6%<br>(72/367)  | 0.518   |

†<140/85 mmHg in patients who are not diabetic and <130/80 mmHg in patients who are diabetic.

‡Target for LDL was <100 mg/dl and <70 mg/dl in patients with coronary artery disease or symptomatic intracranial or extracranial artery stenosis.

§Target in patients with diabetes was less than 58.5 mmol/mol.

||Target for physical activities (self-reported) was ≥30 min per day at least three times per week

Statistical tests used: independent t test for continuous variables and Pearson Chi square test for categorical variables.

SD, standard deviation; LDL, low density lipoprotein.
